# Supplementary material
Source: Springer Nature journal article supplement (https://www.springermedizin.de/resource/supplementary/12885_2008_1441_MOESM5_ESM.pdf/9472020)

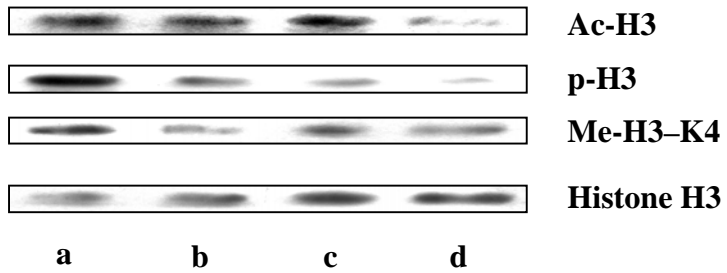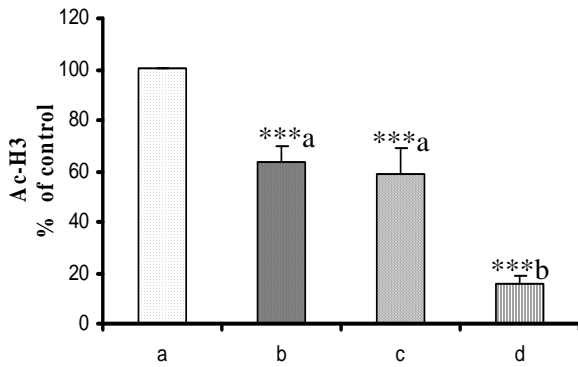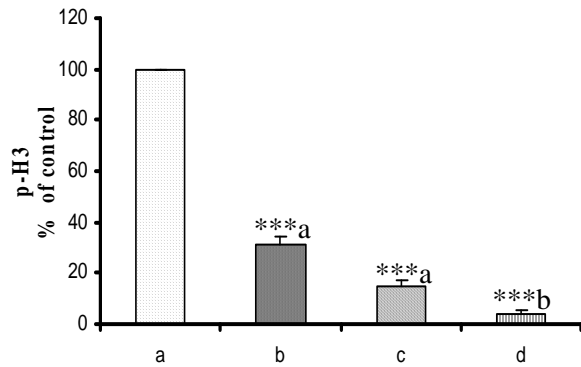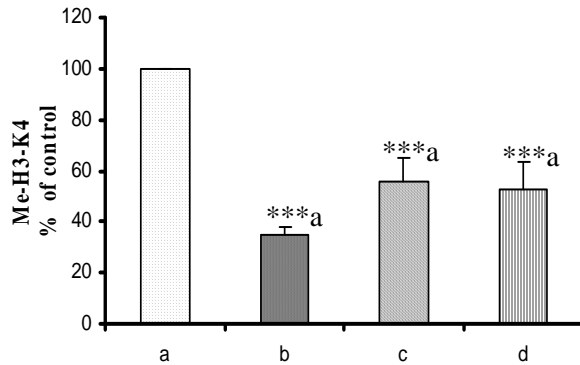

Supplement: MOESM5 [file 9472020]
